# Supplementary material for: Changing care pathways and between-center practice variations in intensive care for traumatic brain injury across Europe: a CENTER-TBI analysis
Source: Springer Nature journal article supplement (doi:10.1007/s00134-020-05965-z), 2020-02-25
Supplement: MOESM9 [file 17741746]

**Table S5: Outcome stratified by GCS severity**

|  | Mild | Moderate | Severe | p-value |
| --- | --- | --- | --- | --- |
|  | 720 | 328 | 961 |  |
| *Outcomes* |  |  |  |  |
| 6-month Mortality | 45/619 (7.3%) | 59/281 (21%) | 256/843 (30%) | <0.001 |
| 6-month Unfavorable Outcome (GOSE<5) | 136/619 (22%) | 114/281 (41%) | 487/843 (58%) | <0.001 |
| Hospital Length of stay in days  (median (IQR)) | 8.2 (3.8 – 16) | 13 (5.1 – 25) | 16 (2.7 – 34) | <0.001 |
| Discharge Location from ICU |  |  |  | <0.001 |
| General Ward | 487/695 (70%) | 174/296 (59%) | 387/761 (51%) |  |
| Home | 9/695 (1.3%) | 2/296 (0.7%) | 3/761 (0.4%) |  |
| Nursing Home | 1/695 (0.1%) | 2/296 (0.7%) | 1/761 (0.1%) |  |
| Other | 9/695 (1.3%) | 7/296 (2.4%) | 19/761 (2.5%) |  |
| Other Hospital | 57/695 (8.2%) | 28/296 (9.5%) | 105/761 (14%) |  |
| Other ICU | 10/695 (1.4%) | 9/296 (3.0%) | 18/761 (2.4%) |  |
| Rehab Unit | 24/695 (3.5%) | 12/296 (4.1%) | 54/761 (7.1%) |  |
| Step down/ High Care Unit | 98/695 (14%) | 62/296 (21%) | 174/761 (23%) |  |
| *Complications at the ICU* |  |  |  |  |
| Ventilator Acquired Pneumonia | 39/712 (5.5%) | 39/324 (12%) | 190/947 (20%) | <0.001 |
| Cardiovascular Complications | 33/712 (4.6%) | 31/324 (9.6%) | 81/948 (8.5%) | <0.01 |
| Meningitis | 4/712 (0.6%) | 5/324 (1.5%) | 33/947 (3.5%) | <0.001 |
| Seizures | 29/711 (4.1%) | 26/324 (8.0%) | 62/947 (6.5%) | <0.001 |
| This table shows the outcomes and ICU complications stratified by GCS severity. The categories ‘vegetative state (GOSE 2)’ and ‘lower severe disability (GOSE 3)’ were combined resulting in a seven-point ordinal scale.’  GOSE: Glasgow Outcome Scale Extended, ICU: Intensive Care Unit, IQR: interquartile range. P-values from ANOVA and chi-square statistics for continuous and categorical characteristics respectively | | | | |
